# Supplementary material for: Arsenic transfer along the soil-sclerotium-stroma chain in Chinese cordyceps and the related health risk assessment
Source: PeerJ. 2021 Mar 9;9:e11023. doi: 10.7717/peerj.11023 (PMC7953876; doi:10.7717/peerj.11023)
Supplement: Supplemental Information 1 [file peerj-09-11023-s001.xlsx]

## Sheet: chromatograms
Note：the words in red are the translations of the following.
1ppb
5ppb
10ppb
50ppb
100ppb
A-1 soil
A-2 soil
A-3 soil
B-1 soil
B-1(soil+ H2O2)
B-2 soil
B-3 soil
C-1 soil
C-1(soil + H2O2)
C-2 soil
C-3 soil
