# Supplementary material for: Arsenic transfer along the soil-sclerotium-stroma chain in Chinese cordyceps and the related health risk assessment
Source: PeerJ. 2021 Mar 9;9:e11023. doi: 10.7717/peerj.11023 (PMC7953876; doi:10.7717/peerj.11023)
Supplement: Supplemental Information 2 [file peerj-09-11023-s002.xlsx]

## Sheet: Sheet1
Sample						As(B)		DMA		As(III)		MMA		AsV
Rjct	Data File	Acq. Date-Time	Type	Level	Sample Name	Conc. [ ppb ]	Count	Conc. [ ppb ]	Count	Conc. [ ppb ]	Count	Conc. [ ppb ]	Count	Conc. [ ppb ]	Count
False	001CALB.d	2017/2/8 14:31:53	CalBlk	1	0
False	002CALS.d	2017/2/8 14:42:28	CalStd	2	2.5	2.557	8701.00	2.555	6595.00	2.488	5570.39	2.571	9607.00	3.139	7891.09
False	003CALS.d	2017/2/8 14:53:17	CalStd	3	5	5.201	17695.20	5.400	13938.49	5.259	11774.06	5.431	20295.63	6.024	15141.19
False	004CALS.d	2017/2/8 15:04:10	CalStd	4	10	10.534	35841.21	10.658	27510.40	10.268	22989.46	10.626	39708.15	11.112	27931.19
False	005CALS.d	2017/2/8 15:15:00	CalStd	5	50	50.406	171495.33	51.177	132089.52	50.937	114039.20	51.234	191462.96	51.531	129521.87
False	006CALS.d	2017/2/8 15:25:55	CalStd	6	100	99.732	339313.00	99.324	256362.20	99.492	222742.23	99.297	371078.41	99.056	248978.24
False	008SMPL.d	2017/2/8 15:47:34	Sample		SCA1	5.932	20182.00			73.475	164495.00			4.611	11590.59
False	009SMPL.d	2017/2/8 15:58:31	Sample		SCA2	5.805	19750.00			79.503	177992.00			4.763	11973.47
False	010SMPL.d	2017/2/8 16:09:22	Sample		STA(1+2)					1.206	2701.00			10.215	25676.00
False	011SMPL.d	2017/2/8 16:20:14	Sample		SCB1	4.445	15124.00			57.941	129719.00			4.500	11312.00
False	012SMPL.d	2017/2/8 16:31:08	Sample		SCB2	4.292	14601.00			59.894	134090.00			4.527	11379.00
False	013SMPL.d	2017/2/8 16:41:55	Sample		STB(1+2)	0.787	2679.00	0.952	2458.00	5.057	11322.00			20.977	52726.00
False	015SMPL.d	2017/2/8 17:03:38	Sample		SCC1	6.566	22339.00			80.999	181341.00			4.762	11969.00
False	016SMPL.d	2017/2/8 17:14:29	Sample		SCC2	5.033	17123.00			68.424	153187.00			4.406	11074.00
False	017SMPL.d	2017/2/8 17:25:18	Sample		STC(1+2)									7.294	18333.00
False	014SMPL.d	2017/2/8 16:52:43	Sample		SCA1+H2O2	6.609	22484.00			50.990	114156.58			18.664	46913.00
False	020SMPL.d	2017/2/9 15:37:10	Sample		SCA2+H2O2	7.085	24106.00			58.541	131061.00			16.347	41089.00
False	021SMPL.d	2017/2/9 15:48:02	Sample		STA(1+2)+H2O2									14.855	37339.00
False	022SMPL.d	2017/2/9 15:58:55	Sample		SCB1+H2O2	5.040	17148.00			40.737	91201.00			15.817	39756.00
False	023SMPL.d	2017/2/9 16:09:48	Sample		SCB2+H2O2	5.198	17685.00			41.696	93348.00			16.270	40895.00
False	024SMPL.d	2017/2/9 16:20:35	Sample		STB(1+2)+H2O2	0.790	2689.00							26.501	66611.00
False	025SMPL.d	2017/2/9 16:31:23	Sample		SCC1 + H2O2	7.877	26801.00			58.882	131825.00			19.353	48643.00
False	026SMPL.d	2017/2/9 16:42:13	Sample		SCC2 + H2O2	5.721	19463.00			58.600	131194.00			17.928	45062.00
False	027SMPL.d	2017/2/9 16:53:02	Sample		STC(1+2)+H2O2									11.151	28027.00
Sample name 0
Sample name 2.5
Sample name 5
Sample name 10
Sample name 50
Sample name 100
Sample name SCA1
SCA2
STA(1+2)
SCB1
SCB2
STB(1+2)
SCC1
SCC2
STC(1+2)
SCA1+H2O2
SCA2+H2O2
STA(1+2)+H2O2
SCB1+H2O2
SCB2+H2O2
STB(1+2)+H2O2
SCC1 + H2O2
SCC2 + H2O2
STC(1+2)+H2O2
