# Supplementary material for: Arsenic transfer along the soil-sclerotium-stroma chain in Chinese cordyceps and the related health risk assessment
Source: PeerJ. 2021 Mar 9;9:e11023. doi: 10.7717/peerj.11023 (PMC7953876; doi:10.7717/peerj.11023)
Supplement: Supplemental Information 3 [file peerj-09-11023-s003.xlsx]

## Sheet: Sheet1
sample name	dry Weight（g）	As(B) (mg/kg)	DMA (mg/kg)	MMA (mg/kg)	unknown organic Arsenic(oAsU)	As(III) (mg/kg)	AsV (mg/kg)	organic Arsenic（total） (mg/kg)	inorganic arsenic (total) (mg/kg)	total arsenic (mg/kg)	different As species (total) (mg/kg)	unextractable arsenic (uAs) (mg/kg)
SCA1	3.3	0.1135	0	0	4.8365	0.2688	0.0882	4.95	0.357	5.307
SCA2	3.7	0.1119	0	0	5.0481	0.2233	0.0918	5.16	0.3151	5.4751
SCA3	3.1	0.1021	0	0	5.8879	0.2244	0.085	5.99	0.3094	6.2994
SCA4	2.6	0.1108	0	0	4.4592	0.2543	0.0971	4.57	0.3514	4.9214
SCB1	3.6	0.0878	0	0	4.4122	0.2235	0.0889	4.5	0.3124	4.8124
SCB2	3	0.0826	0	0	3.9374	0.2261	0.0872	4.02	0.3133	4.3333
SCB3	2.8	0.1024	0	0	4.8876	0.2241	0.089	4.99	0.3131	5.3031
SCB4	2.7	0.111	0	0	3.639	0.2631	0.0831	3.75	0.3462	4.0962
SCC1	2.2	0.1353	0	0	4.8447	0.3007	0.0982	4.98	0.3989	5.3789
SCC2	2.6	0.1197	0	0	4.9603	0.3217	0.1048	5.08	0.4265	5.5065
SCC3	2.9	0.1479	0	0	5.7621	0.3142	0.1096	5.91	0.4238	6.3338
SCC4	2.3	0.1086	0	0	5.0014	0.3115	0.0891	5.11	0.4006	5.5106
STA(1+2)	1.18	0	0	0	0.74	0.08	0.17	0.73	0.25	0.98
STA(3+4)	0.97	0	0	0	0.8	0.06	0.2	0.8	0.26	1.06
STB(1+2)	1.17	0.01	0.01	0	0.94	0.06	0.22	0.95	0.28	1.23
STB(3+4)	0.97	0	0	0	0.76	0.07	0.15	0.76	0.22	0.98
STC(1+2)	0.93	0	0	0	0.58	0.07	0.13	0.57	0.2	0.77
STC(3+4)	1.09	0	0	0	0.68	0.07	0.11	0.68	0.18	0.86
A1	0.25	0.05	0.05	0	3.83	0.79	8.52	3.93	9.31	14.22	13.24	0.98
A2	0.23	0.04	0.02	0	3.95	0.52	9.19	4.01	9.71	17.26	13.72	3.54
A3	0.26	0.03	0.03	0	3.47	0.56	9.03	3.53	9.59	17.46	13.12	4.34
B1	0.23	0.03	0.03	0	2.17	0.77	7.29	2.23	8.06	14.16	10.29	3.87
B2	0.23	0.02	0.03	0	2.25	0.79	7.35	2.3	8.14	12.69	10.44	2.25
B3	0.22	0.04	0.05	0	1.77	0.66	7.75	1.86	8.41	12.25	10.27	1.98
C1	0.22	0.03	0.02	0	3.13	0.63	9.51	3.18	10.14	17.15	13.32	3.83
C2	0.22	0.02	0.07	0	2.57	0.66	9.37	2.66	10.03	14.04	12.69	1.35
C3	0.21	0.03	0.02	0	2.95	0.69	8.81	3	9.5	15.98	12.5	3.48
